# Supplementary material for: Effective double-ended chelating agents: crystal structures of N,N,N′,N′-tetraacetyl diamino derivatives and their chelates
Source: Royal Society of Chemistry journal article supplement (doi:10.1039/c004168h), 2010-01-01
Supplement: c004168h.pdf [file c004168h.pdf]

|                           |                 |                 |                 |                 |                 |                 |                 |                 |
|---------------------------|-----------------|-----------------|-----------------|-----------------|-----------------|-----------------|-----------------|-----------------|
| collected                 | 11242           | 5917            | 8965            | 4787            | 4813            | 13350           | 10247           | 16436           |
| independent               | 3589            | 1378            | 3132            | 1605            | 1536            | 2509            | 2999            | 5433            |
| observed                  | 2569            | 1199            | 2060            | 1361            | 1143            | 2075            | 2538            | 2641            |
| Threshold expression      | >2 $\sigma$ (I) |
| R <sub>1</sub> (observed) | 0.0427          | 0.0461          | 0.0497          | 0.0680          | 0.0635          | 0.0459          | 0.0424          | 0.0714          |
| wR <sub>2</sub> (all)     | 0.1182          | 0.1190          | 0.1694          | 0.1830          | 0.1776          | 0.1203          | 0.1408          | 0.1895          |
